# Supplementary material for: Surgical treatment of symptomatic pineal cysts without hydrocephalus—meta-analysis of the published literature
Source: PubMed Central journal article supplement (PMC8761144; doi:10.1007/s00701-021-05054-0), 2021-12-02
Supplement: 701_2021_5054_MOESM1_ESM.pdf [file 701_2021_5054_MOESM1_ESM.pdf]

Supplementary Figures:

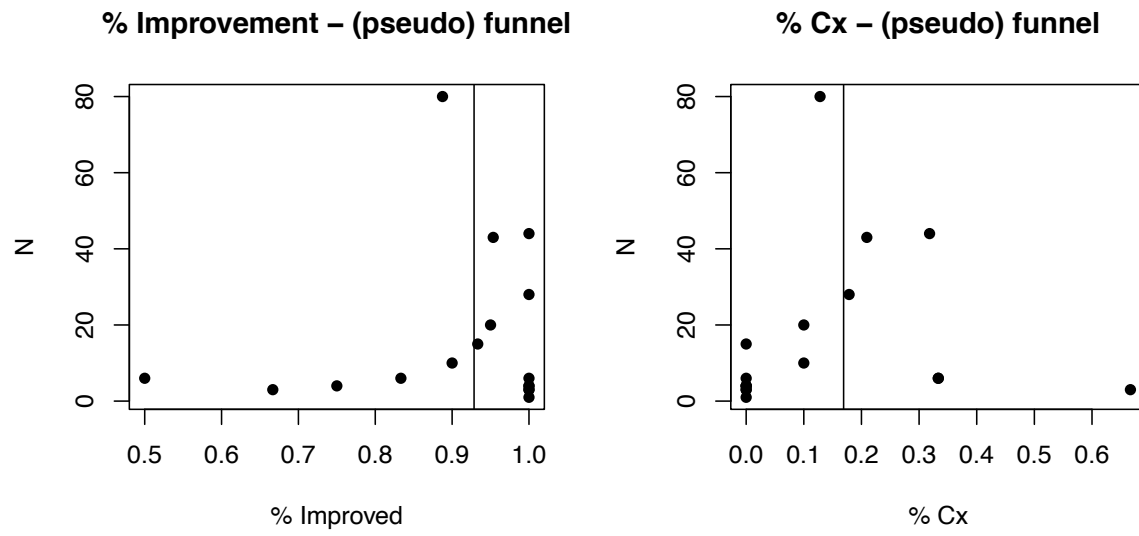

**Supplementary Fig. 1.** Visualization of possible reporting bias.  
Cx= Complications

**Supplementary Fig. 2.** Summary of the quality of evidence that met both inclusion and exclusion criteria. Quality of evidence matrix. Questions are listed below.

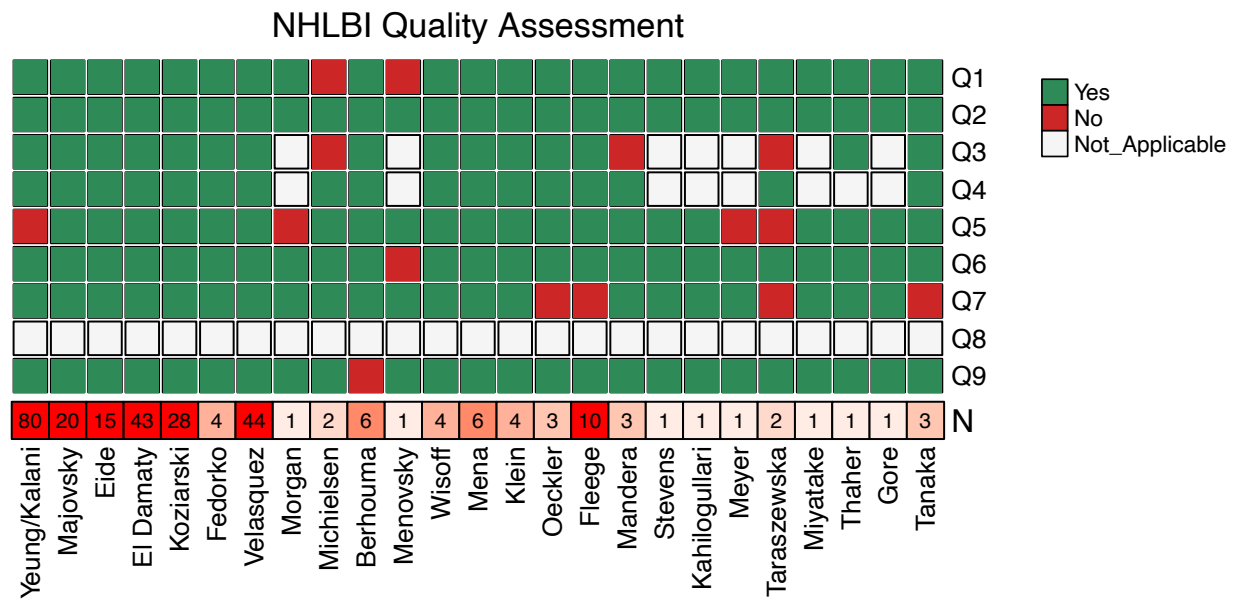

- Q1: Was the study question objective and clearly stated?
  - Q2: Was the study population clearly and fully described, including a case definition?
  - Q3: Were the cases consecutive?
  - Q4: Were the subjects comparable?
  - Q5: Was the intervention clearly described?
  - Q6: Were the outcomes measures clearly defined, valid, reliable, and implemented consistently across all study participants?
  - Q7: Was the length of follow-up adequate?
  - Q8: Were the statistical methods well-described?
  - Q9: Were the results well-described?
- The figure is available in color online.

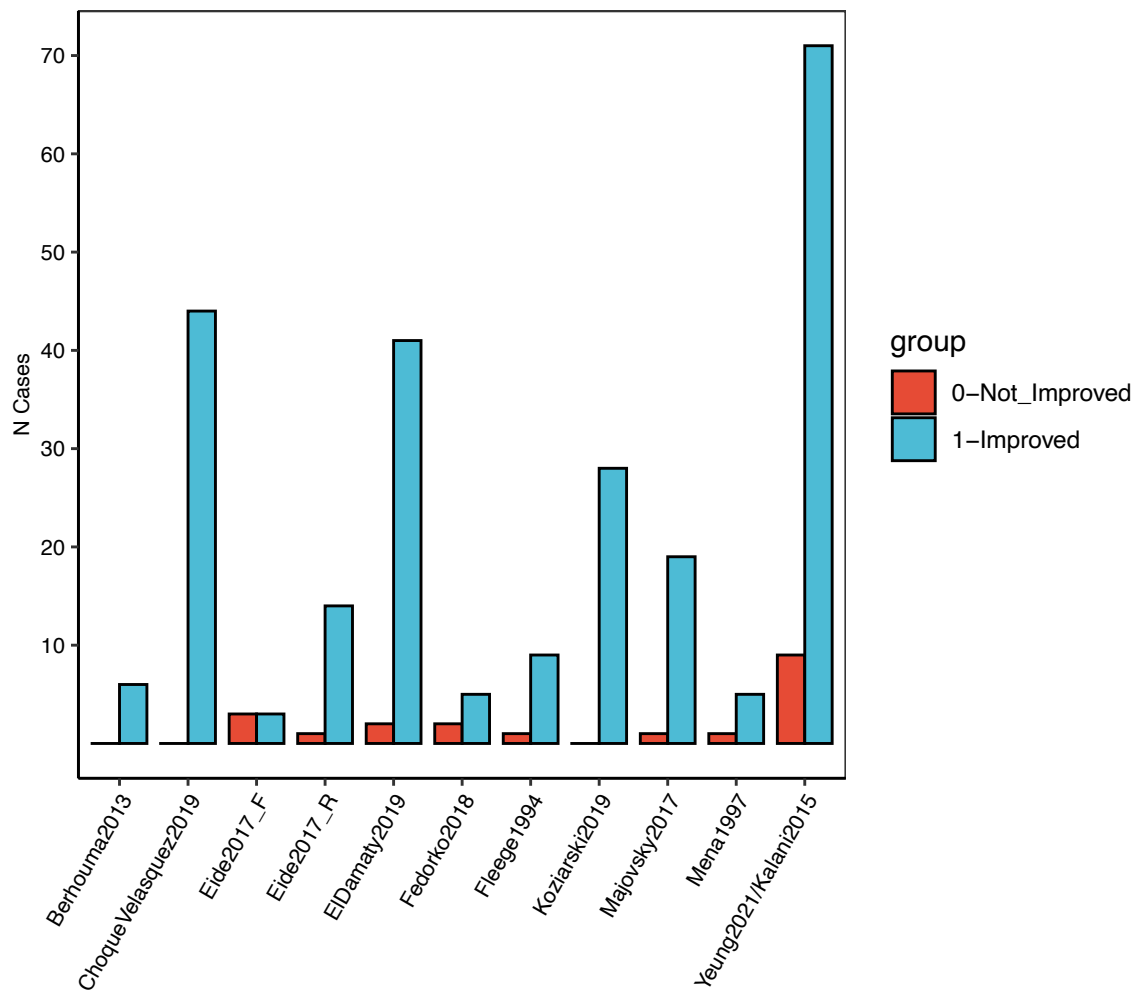

**Supplementary Fig. 3.** Supplementary Figure to show the comparison between the reported improvement rate between different authors. Only authors with  $N > 5$  are shown. Refer to Supplementary Table 9 for a summary of the statistical analysis and a brief discussion of salient findings.

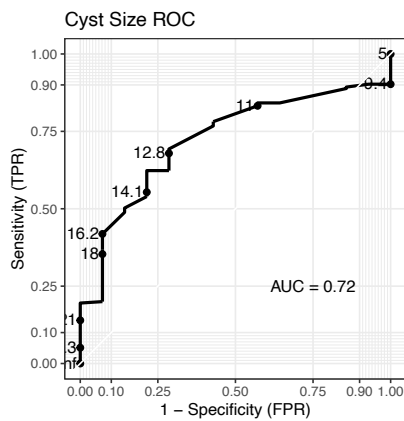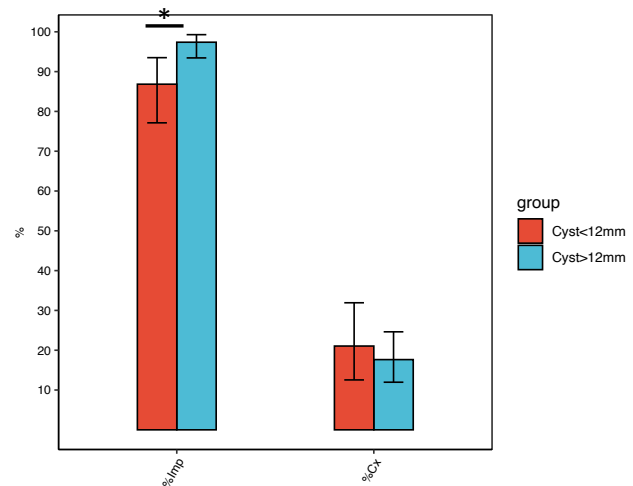

**Supplementary Fig. 4.** Cyst size threshold optimization. From the scatterplot in Supplementary Fig. 5 it appears that the relationship between cyst size and outcome is not linear. Exploratory post-hoc analysis identified an optimal threshold of CS=12mm able to best discriminate outcomes. Of note, cyst size has no effect on complication rate neither as continuous nor categorical variable.

NB: The cyst size threshold =12mm is arbitrary and optimized to this dataset. Its clinical utility is therefore very limited, pending its validation on a distinct dataset.



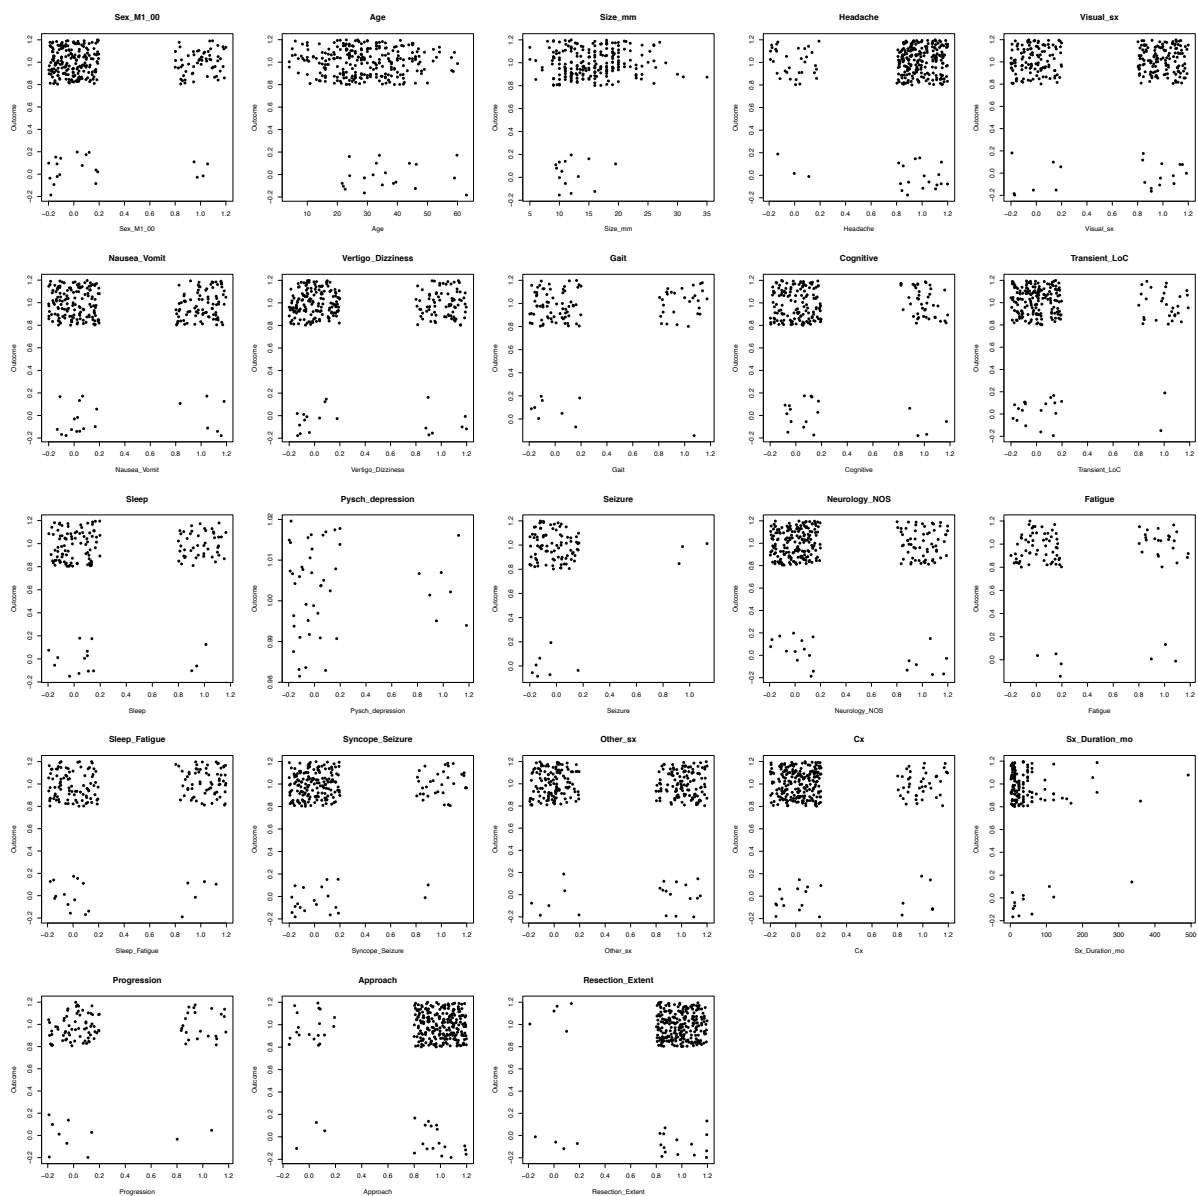

**Supplementary Fig. 6.** Supplementary Figure to show the relationship between each characteristics and patient outcome. Outcome=1 indicates improvement, whilst Outcome=0 indicates no improvement. For categorical variables x and y jitter has been introduced to generates density clouds. For continuous variable jitter was only applied to the y axis.

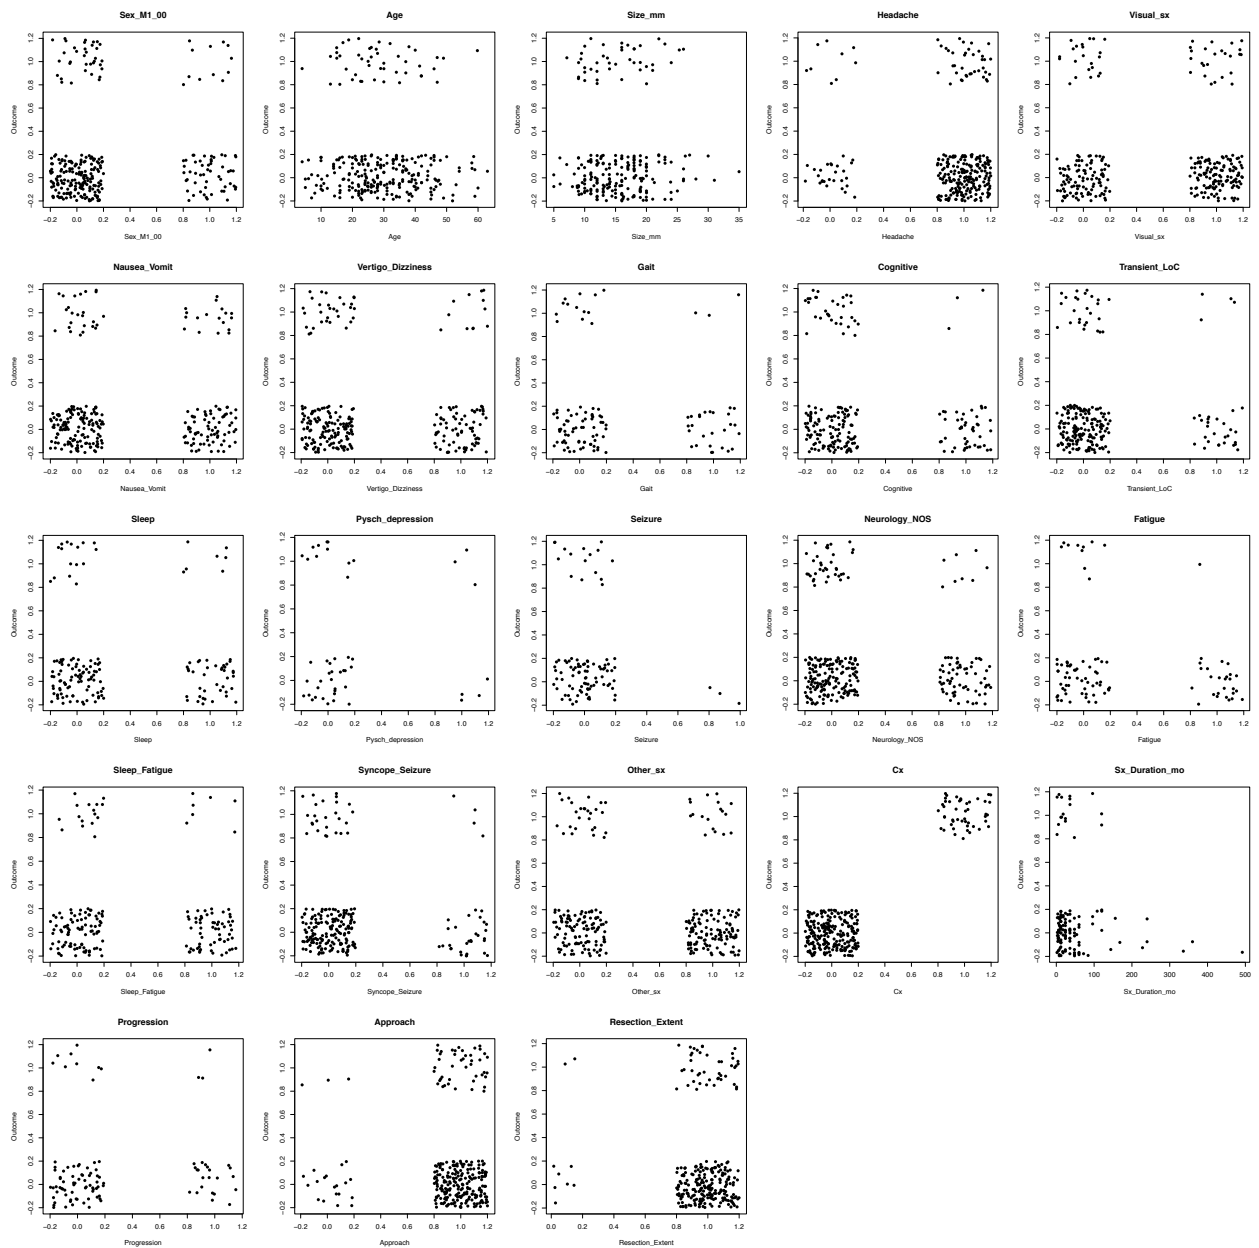

**Supplementary Fig. 7.** Supplementary Figure to show the relationship between each characteristics and patient complications. Outcome=1 indicates complications, whilst Outcome=0 indicates no complications. For categorical variables x and y jitter has been introduced to generates density clouds. For continuous variable jitter was only applied to the y axis.
